# Supplementary material
Source: PubMed Central journal article supplement (PMC4187941)
Supplement: AAC.03605-14_zac010143323so1.pdf [file AAC.03605-14_zac010143323so1.pdf]

## 1 SUPPORTING INFORMATIONS

2

3 **S1. Chemistry.** The synthesis of derivatives RDS 1759, 2291, 1822 and RDS 1760, 2292, 1823 is  
4 reported in Scheme 1. The mono- and di-substituted-N-benzyl-pyrrolyl diketohexenoic acids were  
5 synthesized in a four-step parallel procedure (Scheme 1) using a Büchi SynCor reactor. Pyrrole-2-  
6 carboxaldehyde was alkylated with the appropriate benzyl bromide in the presence of NaH to afford  
7 the N-substituted-pyrrole-2-carboxaldehydes 1a-c, which were converted to the corresponding 3-  
8 buten-2-ones 2a-c by condensation with acetone using NaOH as a base. Compounds 2a-c were then  
9 reacted with diethyl oxalate in the presence of NaOEt as a base to obtain hexenoic esters RDS 1759,  
10 2291, 1822, that were finally hydrolyzed in basic medium to give the corresponding acids RDS 1760,  
11 2292, 1823.

12 The synthetic pathway to obtain derivative RDS 1712 and RDS 2401 is outlined in Scheme 2. The  
13 common intermediates 7a-b were obtained starting from 4 and 6, respectively. The commercially  
14 available 2-formylpyrrole was alkylated in alkaline medium ( $K_2CO_3$ ) to reach 3, which was subjected  
15 to the shift of the formyl chain from 2- to 3- position of the pyrrole ring to achieve derivative 4.  
16 Afterwards, derivative 4 underwent to a condensation reaction in presence of acetone affording 7a.  
17 Conversely, derivative 6 was synthesized building the pyrrole ring via TosMIC reaction, starting  
18 from (3E,5E)-6-phenylhexa-3,5-dien-2-one (1). Compound 6 was then converted into the alkylated  
19 intermediate 7b by alkylation in alkaline medium ( $K_2CO_3$ ) in presence of 4-fluorobenzylbromide.  
20 The common intermediates 7a-b were converted in to the desired products RDS 1759, 2291, 1822  
21 and RDS 1760, 2292, 1823 with the same procedure described above.

22 The compounds RDS1643 and RDS 1644 were synthesized as described previously (2).

23

24

25

26 Scheme 1. <sup>a</sup> Synthesis of derivatives RDS 1759, 2291, 1822 and RDS 1760, 2292, 1823.

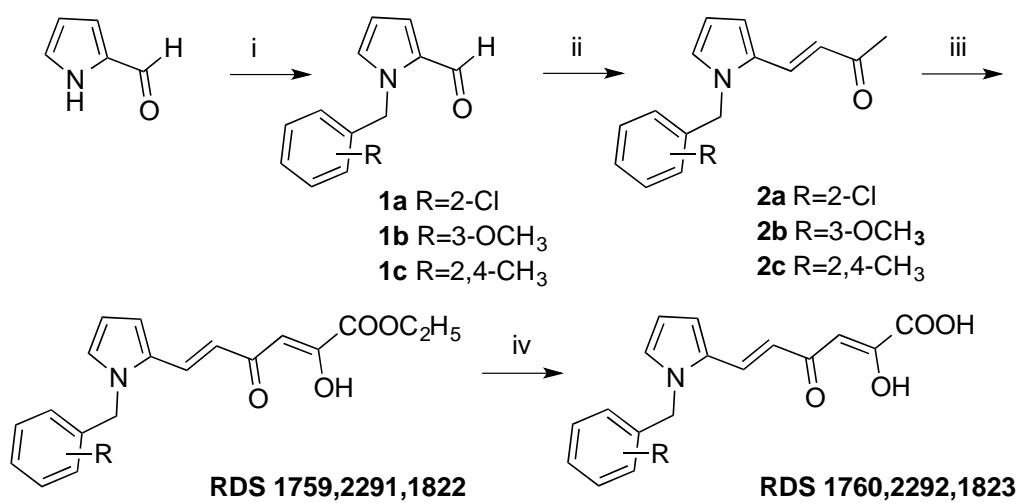

27

28 <sup>a</sup> Reagents and conditions: i: substituted benzyl bromide, NaH, room temp; ii: acetone, 5 N NaOH, 50

29 °C; iii: diethyl oxalate, sodium ethoxide, THF<sub>a</sub>, room temp; iv: 1 N NaOH, 1:1 THF-methanol, room

30 temp.

31

32

33

34 Scheme 2. Synthesis of DKA derivatives RDS 1711, 2400 and RDS 1712, 2401

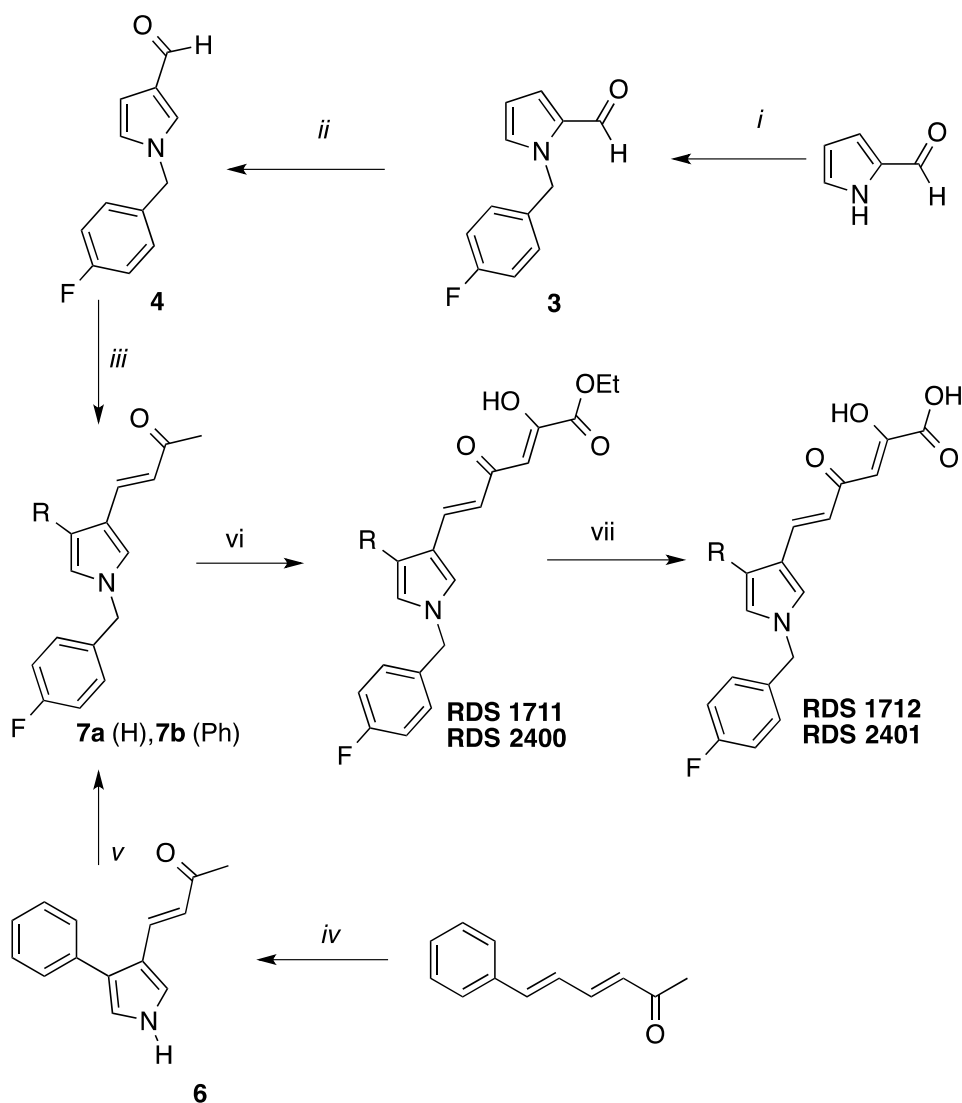

37 <sup>a</sup> Reagents and conditions: (i) 4-fluorobenzyl bromide,  $K_2CO_3$ , DMF, 100 °C, 24 h; (ii)

38 Trifluoroacetic acid, 80 °C, 24 h; (iii) acetone, 4 N NaOH, room temp, 24 h; (iv)  $Et_2O/DMSO$ , NaH,

39 TosMIC, inert atm, room temp, 1 h; (v) 4-fluorobenzyl bromide,  $K_2CO_3$ , DMF, 100 °C, 24 h; (vi)

40 diethyl oxalate,  $C_2H_5ONa$ , THF, room temp, 2 h; (vii) 1 N NaOH, THF/ $CH_3OH$ , room temp, 5 min.

41

42

43

44 Chemistry. General.

45 Melting points were determined with a Büchi 530 capillary apparatus and are uncorrected. Infrared  
46 (IR) spectra were recorded on a Perkin-Elmer Spectrum-One spectrophotometer. <sup>1</sup>H NMR spectra  
47 were recorded on a Bruker AC 400 spectrometer. Merck silica gel 60 F254 plates were used for  
48 analytical TLC. Developed plates were visualized by UV light. Column chromatography was  
49 performed on silica gel (Merck; 70–230 mesh). Compounds purity were always >95% determined by  
50 high-pressure liquid chromatography (HPLC). HPLC analysis was carried out using Shimadzu LC-  
51 10AD VP and CTO-10AC VP. Column used was generally Suplex µKb-100 (250 mm x 4.6 mm, 5  
52 µm). Büchi SynCor was used for parallel synthesis using 50 mL test tubes. Solvents were reagent  
53 grade and, when necessary, purified and dried by standard methods. Organic solutions were dried  
54 over anhydrous sodium sulfate (Merck). Concentration of solution after reactions and extractions  
55 involved the use of a rotary evaporator operating at reduced pressure of approximately 20 Torr.  
56 Analytical results agreed to within ±0.40% of the theoretical values. Dimethylsulfoxide-d<sub>6</sub> 99.9%  
57 (code 44,139-2) and deuteriochloroform 98.8% (code 41,675-4) of isotopic purity (Aldrich) were  
58 used.

59 General procedure for the synthesis of N-[(phenyl)methyl]pyrrole-2-carboxaldehyde. The tubes (25  
60 mL each one) were charged with a solution of pyrrole-2-carboxaldehyde (0.016 mol) in 30 mL of dry  
61 DMF treated with NaH (0.018 mol) and placed in the Büchi SynCor reactor. Then the appropriate  
62 benzyl halide (0.011 mol) were added and the reaction mixtures were stirred with bascular stirring in  
63 Büchi Syncore at room temperature at 250 rpm overnight. The solution was diluted with water and  
64 extracted with ethyl acetate. The collected organic extract was washed with brine (three times), and  
65 dried, and the solvent was evaporated under reduced pressure to obtain crude 1a-c, that were purify  
66 by column chromatography.

67

68 General procedure for the synthesis of 4-(pyrrol-3-yl)but-3-en-2-one. The tubes (25 mL each one)  
69 were charged with a solution of the appropriate aldehyde 1a-c (0.0068 mol) in 14 mL of acetone were  
70 treated with 9.8 mL of NaOH 5 N and stirred at 50 °C with bascular stirring in Büchi Syncore at  
71 room temperature at 250 rpm overnight, and then treated with water. The reaction mixture was  
72 extracted with ethyl acetate. The collected organic extract was washed with brine (three times), and  
73 dried, and the solvent was evaporated under reduced pressure to obtain crude derivatives 2a-c, that  
74 were purify by column chromatography.

75

76 General procedure for the synthesis of Diketo Esters. The tubes (25 mL each one) were charged with  
77 a solution of the appropriated acetyl derivative 2a-c (0.077 mol) and diethyl oxalate (0.077 mol)  
78 dissolved in 8 mL of dry THF and placed in the Büchi SynCor reactor. The reaction mixtures were  
79 treated, under argon stream, with NaOEt obtained by the dissolution of Na (0.0155 mol) in 17 mL of  
80 absolute ethanol. The mixture was stirred with bascular stirring in Büchi Syncore at room  
81 temperature at 250 rpm for 1 h 30 min, then was poured into n-hexane (60 mL). The collected  
82 precipitate was vigorously stirred for 30 min in 1 N HCl (60 mL). The solid that formed was filtered,  
83 washed with water and light petroleum ether and dried under IR lamp to efford the pure diketo ester  
84 RDS 1759, 1822, 2291. Yield (%), melting point (°C), recrystallization solvent, IR, <sup>1</sup>H NMR, and  
85 analytical data are reported for each of the following compounds.

86 6-[1-(2-Chlorophenyl)methyl-1H-pyrrol-2-yl]-2,4-dioxo-5-hexenoic acid ethyl ester (RDS 1759).  
87 100%; 98-99 °C; ligroina; IR  $\nu$  3400 (OH), 1720 (C=O ester), 1600 (C=O ketone)  $\text{cm}^{-1}$ ; <sup>1</sup>H NMR  
88 ( $\text{CDCl}_3$ )  $\delta$  1.36 (t, 3H,  $\text{CH}_2\text{CH}_3$ ), 4.38 (q, 2H,  $\text{CH}_2\text{CH}_3$ ), 5.33 (s, 2H,  $\text{CH}_2$ ), 6.33-6.40 (m, 3H, pyrrole  
89  $\beta$ , hexanoate C3-H and hexanoate C5-H), 6.64 (m, 1H, pyrrole  $\beta$ ), 6.85-6.92 (m, 2H, benzene H and  
90 pyrrole  $\alpha$ ), 7.13-7.27 (m, 2H, benzene H), 7.46 (m, 1H, benzene H), 7.58 (d, 1H,  $J_t = 15.0$  Hz,  
91 hexanoate C6-H), 12-16 (sb, 1H, OH). Anal. ( $\text{C}_{19}\text{H}_{18}\text{ClNO}_4$ ) C, H, N, Cl.

92 6-[1-(3-Methoxyphenyl)methyl-1H-pyrrol-2-yl]-2,4-dioxo-5-hexenoic acid ethyl ester (RDS 1822).  
93 100%; 80-82 °C; ligroina; IR  $\nu$  3400 (OH), 1729 (C=O ester), 1585 (C=O ketone)  $\text{cm}^{-1}$ ;  $^1\text{H}$  NMR  
94 ( $\text{CDCl}_3$ )  $\delta$  1.37 (t, 3H,  $\text{CH}_2\text{CH}_3$ ), 3.76 (s, 3H,  $\text{CH}_3$ ), 4.33 (q, 2H,  $\text{CH}_2\text{CH}_3$ ), 5.20 (s, 2H,  $\text{CH}_2$ ), 6.30 (s,  
95 1H, pyrrole  $\beta$ ), 6.34-6.37 (m, 2H, hexanoate C3-H and hexanoate C5-H), 6.56-6.68 (m, 2H, benzene  
96 H), 6.80-6.85 (m, 2H, benzene H and pyrrole  $\beta$ ), 6.92 (s, 1H, pyrrole  $\alpha$ ), 7.25 (m, 1H, benzene H),  
97 7.63 (d, 1H,  $J_t = 15.3$  Hz, hexanoate C6-H), 12-16 (sb, 1H, OH). Anal. ( $\text{C}_{20}\text{H}_{21}\text{NO}_5$ ) C, H, N.

98 6-[1-(2,4-Dimethylphenyl)methyl-1H-pyrrol-2-yl]-2,4-dioxo-5-hexenoic acid ethyl ester (RDS  
99 2291). 98%; 102-104 °C; benzene/cyclohexane; IR  $\nu$  3400 (OH), 1747 (C=O ester), 1711 (C=O  
100 ketone)  $\text{cm}^{-1}$ ;  $^1\text{H}$  NMR ( $\text{DMF-d}_7$ )  $\delta$  1.44 (t, 3H,  $\text{CH}_2\text{CH}_3$ ), 2.33 (s, 3H,  $\text{CH}_3$ ), 2.36 (s, 3H,  $\text{CH}_3$ ), 4.40  
101 (q, 2H,  $\text{CH}_2\text{CH}_3$ ), 5.21 (s, 2H,  $\text{CH}_2$ ), 6.33 (m, 1H, pyrrole  $\beta$ ), 6.40-6.44 (m, 2H,  $J_t = 15.3$  Hz,  
102 hexanoate C5-H and hexanoate C3-H), 6.66 (d, 1H, benzene H), 6.81 (m, 1H, pyrrole  $\beta$ ), 6.92 (m,  
103 1H, pyrrole  $\alpha$ ), 7.00 (d, 1H, benzene H), 7.09 (s, 1H, benzene H), 7.70 (d, 1H,  $J_t = 15.3$  Hz,  
104 hexanoate C6-H), 12-16 (sb, 1H, OH). Anal. ( $\text{C}_{21}\text{H}_{23}\text{NO}_4$ ) C, H, N.

105

106 General procedure for the synthesis of Diketo Acids. The Tubes (25 mL each one) were charged  
107 with a mixture of 1 N NaOH (9.48 mL) and the appropriated ester RDS 1759, 1822, 2291 (0.0028  
108 mol) in 1:1 THF-Methanol (12 mL) was stirred with bascular stirring in Büchi Syncore at room  
109 temperature at 250 rpm for 1 h 30 min, and then poured into crushed ice. The aqueous mixture was  
110 treated with 1 N HCl until pH 3 was reached, and extracted with ethyl acetate (three times). The  
111 collected organic extract was washed with brine (three times), and dried, and the solvent was  
112 evaporated under reduced pressure to give the pure diketo acids RDS 1760, 1823, 2292. Yield (%),  
113 melting point (°C), recrystallization solvent, IR,  $^1\text{H}$  NMR, and analytical data are reported for each of  
114 the following compounds.

115 6-[1-(2-Chlorophenyl)methyl-1H-pyrrol-2-yl]-2,4-dioxo-5-hexenoic acid (RDS 1760). 61%; 157-159  
116 °C; toluene; IR  $\nu$  3400 (OH), 1688 (C=O acid), 1588 (C=O ketone)  $\text{cm}^{-1}$ ;  $^1\text{H}$  NMR (DMSO- $d_6$ )  $\delta$   
117 5.47 (s, 2H,  $\text{CH}_2$ ), 6.31 (m, 1H, pyrrole  $\beta$ ), 6.43 (s, 1H, hexanoate C3-H), 6.54 (m, 1H, pyrrole  $\beta$ ),  
118 6.67 (d, 1H,  $J_t = 15.5$  Hz, hexanoate C5-H), 7.02 (s, 1H, pyrrole  $\alpha$ ), 7.25-7.32 (m, 3H, benzene H),  
119 7.48-7.58 (m, 2H,  $J_t = 15.5$  Hz, benzene H and hexanoate C6-H), 12-18 (sb, 2H, OH acid and OH  
120 enole). Anal. ( $\text{C}_{17}\text{H}_{14}\text{ClNO}_4$ ) C, H, N, Cl.

121 6-[1-(3-Methoxyphenyl)methyl-1H-pyrrol-2-yl]-2,4-dioxo-5-hexenoic acid (RDS 1823). 100%; 145-  
122 147 °C; toluene; IR  $\nu$  3400 (OH), 1713 (C=O acid), 1614 (C=O ketone)  $\text{cm}^{-1}$ ;  $^1\text{H}$  NMR (DMSO- $d_6$ )  $\delta$   
123 3.70 (s, 3H,  $\text{CH}_3$ ), 5.36 (s, 2H,  $\text{CH}_2$ ), 6.27 (m, 1H, pyrrole  $\beta$ ), 6.43 (s, 1H, hexanoate C3-H), 6.60-  
124 6.64 (m, 3H, benzene H and hexanoate C5-H), 6.82 (m, 1H, benzene H), 6.97 (m, 1H, pyrrole  $\beta$ ),  
125 7.22 (m, 1H, benzene H), 7.29 (m, 1H, pyrrole  $\alpha$ ), 7.64 (d, 1H,  $J_t = 15.4$  Hz, hexanoate C6-H), 12-18  
126 (sb, 2H, OH acid and OH enole). Anal. ( $\text{C}_{18}\text{H}_{17}\text{NO}_5$ ) C, H, N.

127 6-[1-(2,4-Dimethylphenyl)methyl-1H-pyrrol-2-yl]-2,4-dioxo-5-hexenoic acid (RDS 2292). 59%;  
128 151-153°C; toluene; IR  $\nu$  3400 (OH), 1747 (C=O acid), 1711 (C=O ketone)  $\text{cm}^{-1}$ ;  $^1\text{H}$  NMR (DMF)  $\delta$   
129 2.47 (s, 3H,  $\text{CH}_3$ ), 2.57 (s, 3H,  $\text{CH}_3$ ), 5.68 (s, 2H,  $\text{CH}_2$ ), 6.56 (m, 1H, pyrrole  $\beta$ ), 6.69-6.73 (m, 2H,  
130 benzene H and hexanoate C3-H), 6.95 (d, 1H,  $J_t = 15.7$  Hz, hexanoate C5-H), 7.17 (d, 1H, benzene  
131 H), 7.28 (s, 1H, benzene H), 7.33 (s, 1H, pyrrole  $\beta$ ), 7.42 (s, 1H pyrrole  $\alpha$ ), 7.94 (d, 1H,  $J_t = 15.7$  Hz,  
132 hexanoate C6-H), 12-18 (sb, 2H, OH acid and OH enole). Anal. ( $\text{C}_{19}\text{H}_{11}\text{NO}_4$ ) C, H, N.

133 Synthesis of pyrrole nucleus. To a solution of □□-unsaturated ketone (5.42 mmol) and toluene-4-  
134 sulfonylmethylisocyanide (1.16 g, 5.96 mmol, 1.1 eq) in a mixture of anhydrous dimethyl sulfoxide /  
135 ethyl ether (14:30 mL) was added dropwise into a well-stirred suspension of sodium hydride (60% in  
136 paraffine oil; 0.48 g, 11.93 mmol, 2.2 eq) in dry ethyl ether (30 mL) under argon atmosphere. After  
137 the addition, the mixture was stirred at room temperature for 1 hour. The reaction was treated with  
138 water and extracted with ethyl acetate. The organic layer was washed with brine, dried over

139 anhydrous sodium sulfate and concentrated under vacuum. The crude product, was purified by  
140 chromatography on aluminum oxide (using chloroform as eluent), to afford the pure product. Yield  
141 (%), melting point (°C), recrystallization solvent, IR, <sup>1</sup>H NMR are reported for each compounds.

142 Alkylation of the pyrrolic nitrogen. A mixture of opportune pyrrole (1.1 mmol), alkylating agent (3.3  
143 mmol), and anhydrous K<sub>2</sub>CO<sub>3</sub> (210 mg, 1.5 mmol) in dry DMF (10 mL) was stirred at 100 °C for 2 h.  
144 After the mixture was cooled, Treated with water (40 mL), extracted with ethyl acetate. The organic  
145 layer was washed with brine, dried over anhydrous sodium sulfate and concentrated under vacuum.  
146 The crude product, was purified by chromatography on silica gel to afford the pure product.  
147 Chromatographic eluent, yield (%), melting point (°C), recrystallization solvent, IR, <sup>1</sup>H NMR are  
148 reported for the compound.

149 Condensation of pyrrole carboxaldehyde with acetone. The opportune pyrrole carboxaldehyde (0.075  
150 mol) was dissolved in 250 mL of acetone. To this mixture was added NaOH 4N (110 mL) and the  
151 reaction was stirred at room temperature for 24 h. After this period water (300 mL) and ethyl acetate  
152 (250 mL) were added. The organic layer was separated, washed with water (2 x 100 mL), dried over  
153 sodium sulfate, filtered and evaporated under reduced pressure. The crude product was purified with  
154 column chromatography on silica gel, to obtain pure products. Chromatographic eluent, yield (%),  
155 melting point (°C), recrystallization solvent, IR, <sup>1</sup>H NMR are reported for each compounds.

156 Shift from  $\alpha$  to  $\beta$  of the acetyl group. A mixture of opportune alpha acetyl-substituted pyrrole (1.23  
157 mmol) in trifluoroacetic acid (5 mL), was heated at 80 °C for 20 h. After this period the reaction was  
158 quenched with water (30 mL) and extracted with ethyl acetate (2 x 50 mL). The organic layers were  
159 collected, dried over sodium sulfate, filtered and evaporated under vacuum. The crude product was  
160 purified with chromatography on silica gel (chloroform as eluent) to afford pure product as a brown  
161 oils. Yield (%), melting point (°C), recrystallization solvent, IR, <sup>1</sup>H NMR are reported for each  
162 compounds.



163 Synthesis of Diketo Esters. Freshly prepared sodium ethoxide (390 mg, 5.5 mmol) was added into a  
164 well-stirred mixture of the appropriate acetyl derivative (2.7 mmol) and diethyl oxalate (790 mg, 5.4  
165 mmol) in anhydrous THF (2.7 mL) under nitrogen atmosphere. The mixture was stirred at room  
166 temperature for 2 h, and then was poured into n-hexane (50 mL). The collected precipitate was  
167 vigorously stirred for 30 min in 1 N HCl (50 mL). The yellow solid that formed was filtered, washed  
168 with water, and dried under IR lamp to afford the pure diketo esters. Yield (%), melting point (°C),  
169 IR, <sup>1</sup>H NMR are reported for each compounds.

170 Synthesis of diketo acids. A mixture of 1 N NaOH (6.5 mL) and the appropriate ester (1.3 mmol) in  
171 1:1 THF/methanol (12 mL) was stirred at room temperature for 40 min and then poured onto crushed  
172 ice. The aqueous layer was treated with 1 N HCl until pH 3 was reached, and the solid that formed  
173 was collected by filtration, then washed with water and desiccated under a warming lamp to afford  
174 pure acids. Yield (%), melting point (°C), IR, <sup>1</sup>H NMR are reported for each compounds.

175 1-(4-Fluorobenzyl)-1H-pyrrole-2-carboxaldehyde (3). Compound 3 was prepared from commercially  
176 available pyrrole-2-carboxaldehyde by means GP-B, using 4-fluorobenzyl bromide as alkylating  
177 agent. Chloroform; 80% as brown oil; IR  $\square$  1640 (C=O) cm<sup>-1</sup>. <sup>1</sup>H NMR (CDCl<sub>3</sub>)  $\delta$  5.54 (s, 2H, CH<sub>2</sub>),  
178 6.30 (t, 1H, J = 4 Hz, pyrrole C4-H), 6.9-7.0 (m, 4H, benzene H), 7.15 (d, 1H, J = 4 Hz, pyrrole C3-  
179 H), 7.17 (d, 1H, J = 4 Hz, pyrrole C5-H), 9.57 (s, 1H, CHO). Anal. (C<sub>12</sub>H<sub>10</sub>FNO) C, H, N, F.

180 1-(4-Fluorobenzyl)-1H-pyrrole-3-carboxaldehyde (4). Compound 4 was prepared from 3 by means  
181 GP-D. 55% as brown oil; IR  $\square$  1640 (C=O aldehyde) cm<sup>-1</sup>. <sup>1</sup>H NMR (CDCl<sub>3</sub>)  $\delta$  5.08 (s, 2H, CH<sub>2</sub>),  
182 6.6 (s, 1H, pyrrole C4-H), 6.7 (s, 1H, pyrrole C-2H), 7.0-7.2 (m, 4H, benzene H), 7.31 (s, 1H, pyrrole  
183 C2-H), 9.75 (s, 1H, CHO). Anal. (C<sub>12</sub>H<sub>10</sub>FNO) C, H, N, F.

184 4-(4-Phenyl-1H-pyrrol-3-yl)but-3-en-2-one (6). Compound 6 was prepared from (3E,5E)-6-  
185 phenylhexa-3,5-dien-2-one by means GP-A. 56% as brown solid. M.P; toluene; IR  $\square$ 1640 (C=O  
186 ketone) cm<sup>-1</sup>. <sup>1</sup>H NMR (CDCl<sub>3</sub>)  $\delta$  2.47 (s, 3H, CH<sub>3</sub>), 6.88 (s, 1H, J = 16.5 Hz, butenone C3-H), 7.10-

187 7.55 (M, 7H, pyrrole C2-H, pyrrole C5-H and benzene H), 7.81 (s, 1H, J = 16.5 Hz, butenone C4-H),  
188 9.0 (sb, 1H, NH). Anal. (C<sub>14</sub>H<sub>13</sub>NO) C, H, N.

189 4-(1-(4-Fluorobenzyl)-1H-pyrrol-3-yl)but-3-en-2-one (7a). Compound 7a was prepared from 4 by  
190 means GP-C. 70% as brown oil; IR  $\square$  1655 (C=O ketone) cm<sup>-1</sup>. <sup>1</sup>H NMR (CDCl<sub>3</sub>)  $\delta$  2.34 (s, 3H,  
191 CH<sub>3</sub>), 5.07 (s, 2H, CH<sub>2</sub>), 6.43-6.48 (m, 2H, pyrrole C4-H and butenone C3-H), 6.71 (s, 1H, pyrrole  
192 C2-H), 7.0 (s, 1H, pyrrole C5-H), 7.06-7.12 (m, 2H, benzene H), 7.15-7.18 (m, 2H, benzene H), 7.49  
193 (d, 1H, butenone C4-H, J = 16 Hz). Anal. (C<sub>15</sub>H<sub>14</sub>FNO) C, H, N, F.

194 4-(1-(4-Fluorobenzyl)-4-phenyl-1H-pyrrol-3-yl)but-3-en-2-one (7b). Compound 7b was prepared  
195 from 6 by means GP-B, using 4-fluorobenzyl bromide as alkylating agent. Chloroform; 63% as  
196 brown oil; IR  $\square$  1640 (C=O) cm<sup>-1</sup>. <sup>1</sup>H NMR (CDCl<sub>3</sub>)  $\delta$  2.44 (s, 3H, CH<sub>3</sub>), 5.07 (s, 2H, CH<sub>2</sub>), 6.82 (s,  
197 1H, J = 16.3 Hz, butenone C3-H), 6.90 (s, 1H, ), 6.99-7.54 (m, 11H, pyrrole C2-H, pyrrole C5-H,  
198 benzene H and benzyl H), 7.80 (s, 1H, J = 16.3 Hz, butenone C4-H). Anal. (C<sub>21</sub>H<sub>18</sub>FNO) C, H, N,  
199 F.

200 Ethyl 6-(1-(4-fluorobenzyl)-4-phenyl-1H-pyrrol-3-yl)-2-hydroxy-4-oxohexa-2,5-dienoate (RDS  
201 1711). Compound RDS 1711 was prepared from 7a by means GP-F. 56% as yellow solid; 121-  
202 122°C; cyclohexane; IR  $\square$  2900 (OH enole), 1720 (C=O ester), 1620 (C=O ketone) cm<sup>-1</sup>. <sup>1</sup>H NMR  
203 (CDCl<sub>3</sub>)  $\delta$  1.43 (t, 3H, CH<sub>3</sub>CH<sub>2</sub>), 4.40 (q, 2H, CH<sub>2</sub>CH<sub>3</sub>), 5.09 (s, 2H, CH<sub>2</sub>), 6.73 (s, 1H, hexanoate  
204 C3-H) 6.87 (d, 1H, J = 16.6 Hz, hexanoate C5-H), 7.01 (s, 1H, pyrrole C5-H), 7.08-7.54 (m, 10H,  
205 pyrrole C2-H, benzene H and benzyl H), 7.74 (d, 1H, hexanoate C6-H), 15 (bs, 1H, enole). Anal.  
206 (C<sub>25</sub>H<sub>21</sub>FNO<sub>4</sub>) C, H, N, F.

207 Ester 6-(1-(4-fluorobenzyl)-1H-pyrrol-3-yl)-2-hydroxy-4-oxohexa-2,5-dienoate (RDS 2400).  
208 Compound RDS 2400 was prepared from 7b by means GP-F. 41% as yellow solid; 88-90 °C;  
209 ligroine; IR  $\square$  3400 (OH enole), 1725 (C=O ester), 1625 (C=O ketone) cm<sup>-1</sup>. <sup>1</sup>H NMR (CDCl<sub>3</sub>)  $\delta$   
210 1.44 (t, 3H, J = 7 Hz, CH<sub>3</sub>CH<sub>2</sub>), 4.41 (q, 2H, J = 7 Hz, CH<sub>2</sub>CH<sub>3</sub>), 5.08 (s, 2H, CH<sub>2</sub>), 6.39 (s, 1H, J =  
211 16 Hz, hexanoate C5-H), 6.5-6.6 (m, 2H, pyrrole C4-H and hexanoate C3-H), 6.7 (t, 1H, pyrrole C5-

212 H), 7.0 (t, 1H, pyrrole C2-H), 7.08-7.20 (m, 4H, benzene H), 7.75 (s, 1H, J = 16 Hz, hexanoate C6-  
213 H), 14 (br s, 1H, enole). Anal. (C<sub>19</sub>H<sub>18</sub>FNO<sub>4</sub>) C, H, N, F.

214 6-(1-(4-Fluorobenzyl)-1H-pyrrol-3-yl)-2-hydroxy-4-oxohexa-2,5-dienoic acid (RDS 2401).

215 Compound RDS 2401 was prepared from RDS 2400 by means GP-G. 92% as yellow solid; >300 °C;

216 DMF/H<sub>2</sub>O; IR  $\bar{\nu}$  3500-2500 (OH acid and enole), 1720 (C=O acid), 1630 (C=O ketone) cm<sup>-1</sup>. <sup>1</sup>H

217 NMR (DMF d<sub>7</sub>)  $\delta$  5.34 (s, 2H, benzyl), 6.39 (s, 1H, hexanoate C3-H), 6.54 (d, 1H, hexanoate C5-H),

218 6.7 (bs, 1H, pyrrole C4-H), 7.38-7.67 (m, 7H, pyrrole C2-H, pyrrole C5-H, benzene H and hexanoate

219 C6-H), 14 (br s, 2H, OH enole and acid). Anal. (C<sub>17</sub>H<sub>16</sub>FNO<sub>4</sub>) C, H, N, F.

220 6-(1-(4-Fluorobenzyl)-4-phenyl-1H-pyrrol-3-yl)-2-hydroxy-4-oxohexa-2,5-dienoic acid (RDS 1712).

221 Compound RDS 1712 was prepared from RDS1711 by means GP-G. 75% as yellow solid; 128-

222 129°C; benzene; IR  $\bar{\nu}$  3500-2500 (OH acid and enole), 1700 (C=O acid), 1600 (C=O ketone) cm<sup>-1</sup>.

223 <sup>1</sup>H NMR (CDCl<sub>3</sub>)  $\delta$  5.20 (s, 2H, CH<sub>2</sub>), 6.75 (bs, 1H, hexanoate C3-H), 6.80 (d, 1H, hexanoate C5-H),

224 7.1-7.6 (m, 12H, pyrrole C2-H, pyrrole C5-H, benzene H, benzyl H and hexanoate C6-H), 14 (br s,

225 2H, enole and acid). Anal. (C<sub>23</sub>H<sub>17</sub>FNO<sub>4</sub>) C, H, N, F.

226

227

228 1. Nongkhilaw, R. L.; Nongrum, R.; Myrboh B. (2001) Synthesis of substituted hexa-3,5-dienoic  
229 acid methyl esters from conjugated dienones J. Chem. Soc., Perkin Trans. 1: 1300-1303.

230 2. Costi R et al. (2013) 6-(1-Benzyl-1H-pyrrol-2-yl)-2,4-dioxo-5-hexenoic Acids as Dual  
231 Inhibitors of recombinant HIV-1 Integrase and Ribonuclease H, Synthesized by a Parallel  
232 Synthesis Approach. J Med Chem.56: 8588-98.

233

234 Analyses

| Compd    | Elemental Analyses Calculated/ Found |      |      |       |      |
|----------|--------------------------------------|------|------|-------|------|
|          | C                                    | H    | N    | Cl    | F    |
| RDS 1759 | 63.41                                | 5.04 | 3.89 | 9.86  |      |
|          | 63.21                                | 4.87 | 4.01 | 9.80  |      |
| RDS 1822 | 67.58                                | 5.96 | 3.94 |       |      |
|          | 67.59                                | 5.98 | 3.98 |       |      |
| RDS 2291 | 71.36                                | 6.56 | 3.97 |       |      |
|          | 71.32                                | 5.47 | 3.64 |       |      |
| RDS 1760 | 61.53                                | 4.26 | 4.22 | 10.69 |      |
|          | 61.59                                | 4.36 | 4.37 | 10.71 |      |
| RDS 1823 | 66.03                                | 5.24 | 4.28 |       |      |
|          | 65.98                                | 5.23 | 4.33 |       |      |
| RDS 2292 | 70.13                                | 5.89 | 4.31 |       |      |
|          | 70.10                                | 5.90 | 4.29 |       |      |
| RDS 1711 | 71.59                                | 5.29 | 3.34 |       | 4.53 |
|          | 71.53                                | 5.34 | 3.31 |       | 4.66 |
| RDS 2400 | 66.46                                | 5.28 | 4.08 |       | 5.53 |
|          | 66.50                                | 5.20 | 3.99 |       | 5.61 |

|          |       |      |      |      |
|----------|-------|------|------|------|
| RDS 2401 | 64.76 | 4.48 | 4.44 | 6.03 |
|          | 64.70 | 4.51 | 4.49 | 6.15 |
| RDS1712  | 70.58 | 4.64 | 5.58 | 4.85 |
|          | 70.40 | 4.57 | 5.51 | 4.76 |

235

236

237

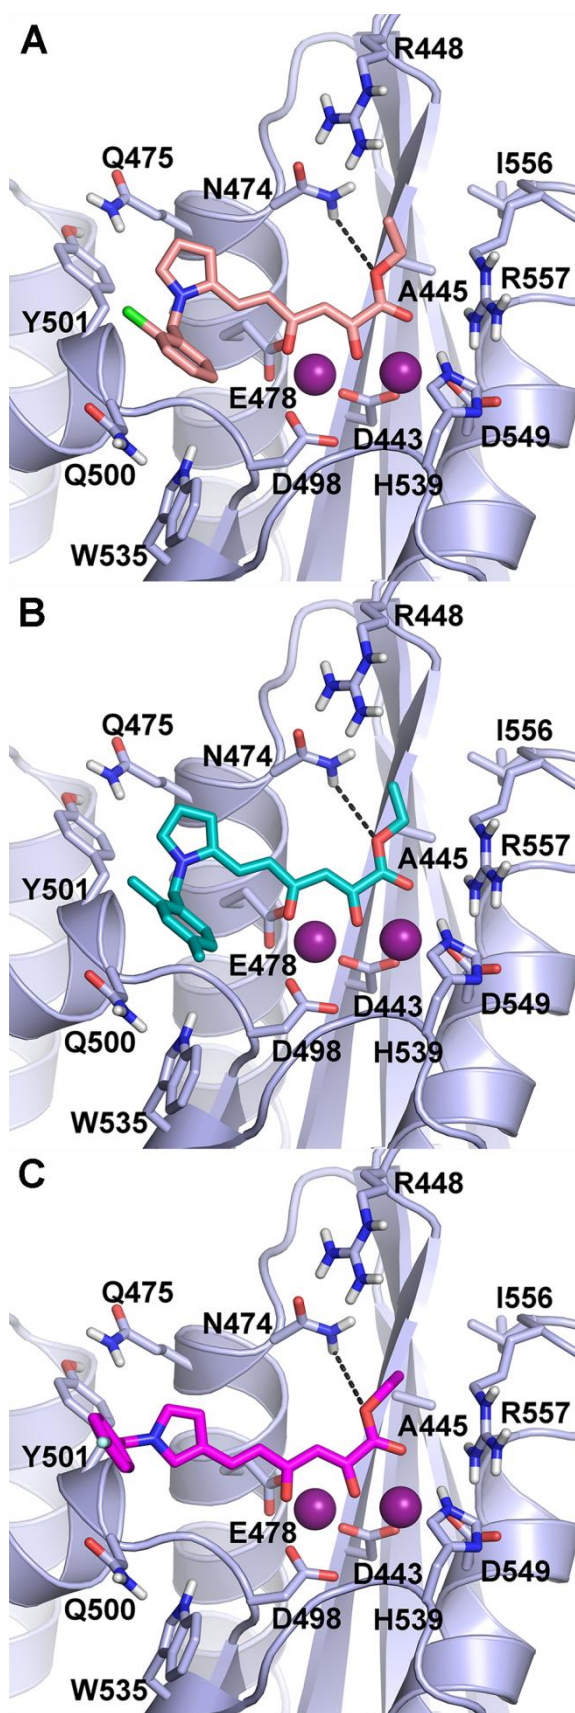

240 **Figure S2. Binding modes of compounds RDS1759, RDS2291 and RDS2400 at the HIV-1**  
241 **RNase H active site.** RDS1759 (A), RDS2291 (B) and RDS2400 (C) are represented as pink, cyan,  
242 and magenta sticks, respectively. The receptor is shown as purple cartoons. Amino acids involved in  
243 ligand binding are highlighted as sticks. The active site ions  $Mg^{2+}$  ions are represented as magenta  
244 spheres.  
245  
246

247 **Figure S2. Time-dependent viral replication inhibition by RDS1759.**

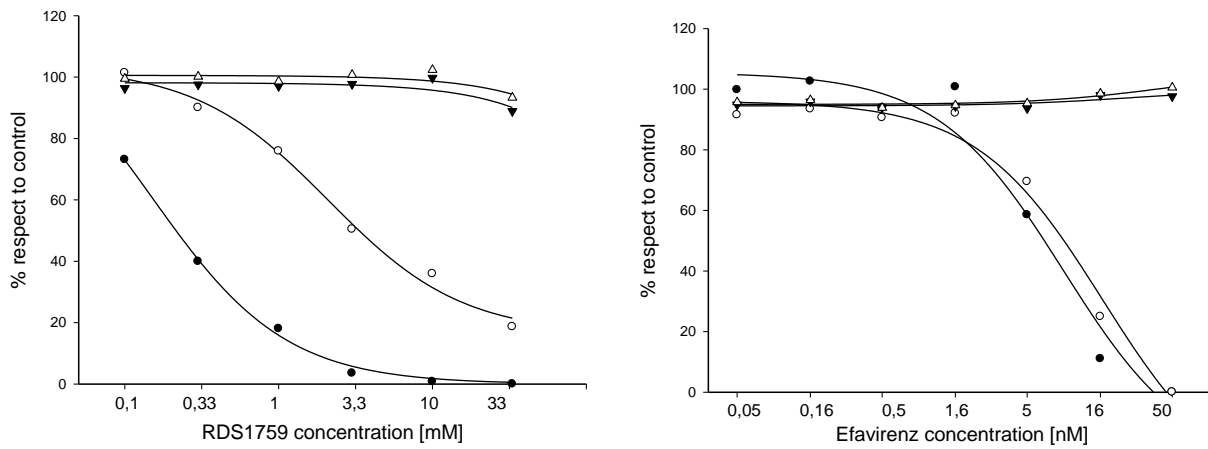

248

249

250 HIV-1 infected MT4 cells were treated with increasing concentrations of RDS1759 (Panel A) and

251 EFV (Panel B). Percentage of GFP emitting cells was measured at 24 hours p.i. (●) and 48 hours p.i.

252 (○). MT4 cell viability was also evaluated at 24 hours p.i. (▼) and 48 hours (Δ).
